# Supplementary material
Source: PubMed Central journal article supplement (PMC6707919)
Supplement: JB.00650-18-s0001.pdf [file JB.00650-18-s0001.pdf]

1 **A putative type V pilus contributes to *Bacteroides thetaiotaomicron* biofilm**  
2 **formation capacity**

3 Jovana MIHAJLOVIC; Nathalie BECHON; Christa IVANOVA; Florian CHAIN; Alexandre ALMEIDA;  
4 Philippe LANGELLA; Christophe BELOIN; and Jean-Marc GHIGO

5

6 **SUPPLEMENTARY MATERIAL**

7

8 **SUPPLEMENTARY FIGURES**

9

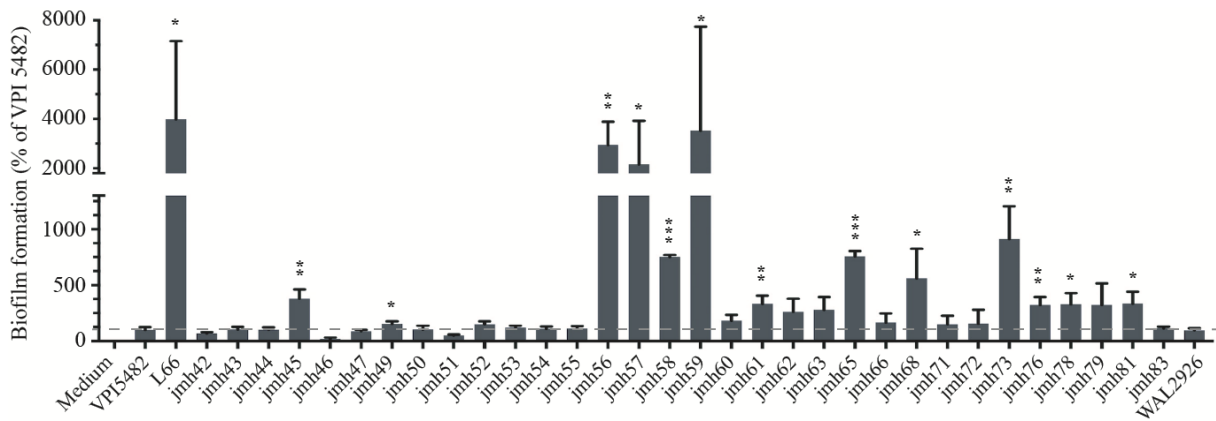

10

11 **Supplementary Figure S1. Biofilm formation by 34 *B. thetaiotaomicron* natural isolates.**

12 Comparison of biofilm formation in various *B. thetaiotaomicron* isolates in a 96-well plate  
13 biofilm assay followed by crystal violet staining. VPI 5482 biofilm formation has been set to  
14 100% as represented by the grey dashed lines and used for reference in the statistical test.  
15 These strains were collected from adults by the Microbiology laboratory of Dupuytren  
16 (Limoges) and Dron Tourcoing (Tourcoing) hospitals in France. For a complete list of the  
17 strains, see supplementary Table S3. Error bars indicate standard deviation of 3 technical  
18 replicates. \* p<0.05; \*\* p<0.01; \*\*\* p<0.001.

19

20

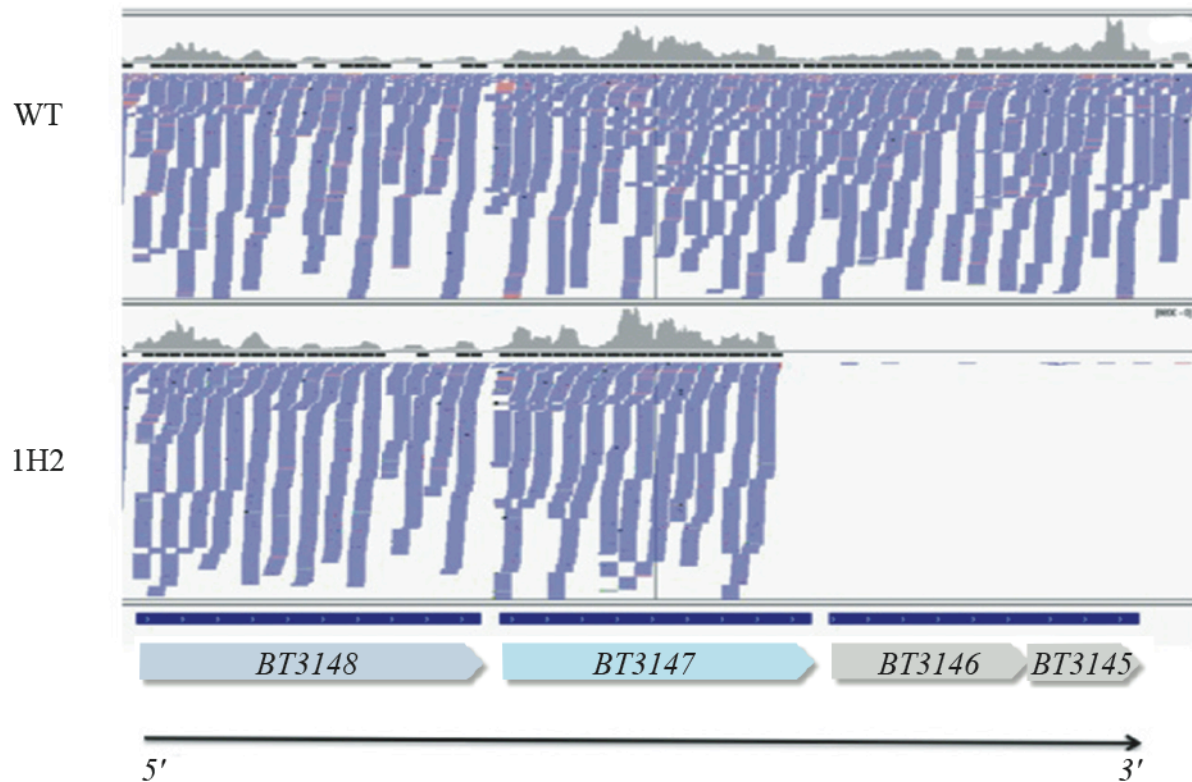

21  
22

23 **Supplementary Figure S2. Transcription in *BT3148-5* locus in WT *B. thetaiotaomicron***  
 24 **VPI 5482 and the transposon mutant 1H2.** Reads mapping in the *BT3148-5* region are  
 25 represented in blue, antisense reads are represented in red. Strand-specific mapping shows no  
 26 antisense transcripts arising from the *BT3146-5* towards *BT3147*. *BT3147* transcript is  
 27 uninterrupted in the WT indicating that there are no premature stop codons or transcription-  
 28 stopping secondary structures. Transcription of the last portion of *BT3147* (position 1047 to  
 29 1167 bp) and *BT3146-5* is abolished in 1H2 due to transposon insertion.

30

31

32

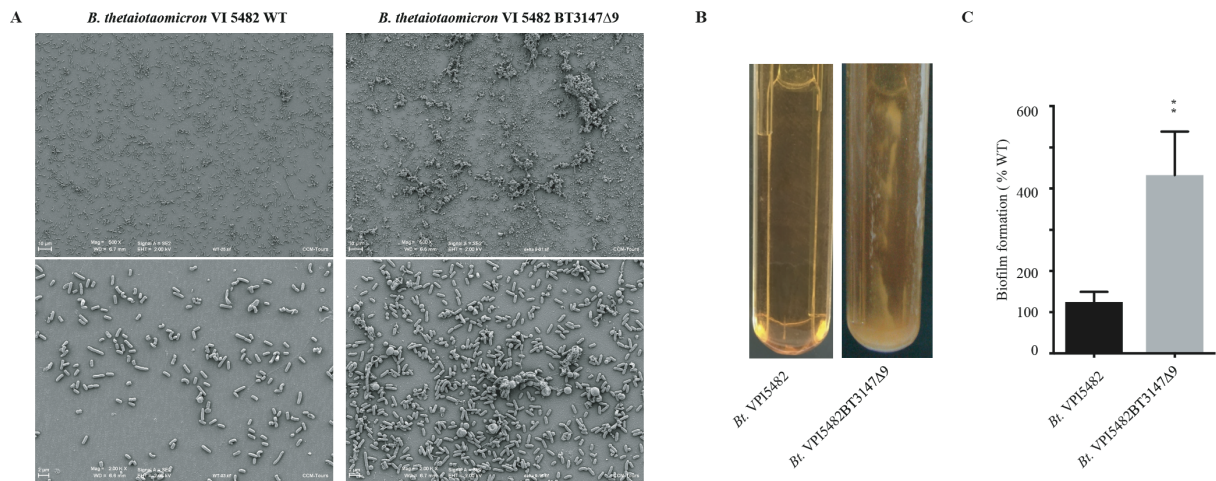

33

34 **Supplementary Figure S3. C-terminal truncation of BT3147 increases *in vitro* adhesion**  
35 **and biofilm formation.** **A** Scanning electron microscopy observation of *B. thetaiotaomicron*  
36 WT and *BT3147Δ9* grown in continuous flow biofilm-microfermenter (x500 and x2000  
37 magnification) **B** Biofilm formation *B. thetaiotaomicron* WT and *BT3147Δ9* on a glass slide  
38 inserted in continuous flow biofilm microfermenters. The images were taken 48h after  
39 inoculation. **B** Quantification after resuspension and measure at OD 600 of *B.*  
40 *thetaiotaomicron* WT and *BT3147Δ9* in continuous flow biofilm microfermenters after 48h.

41

42

43

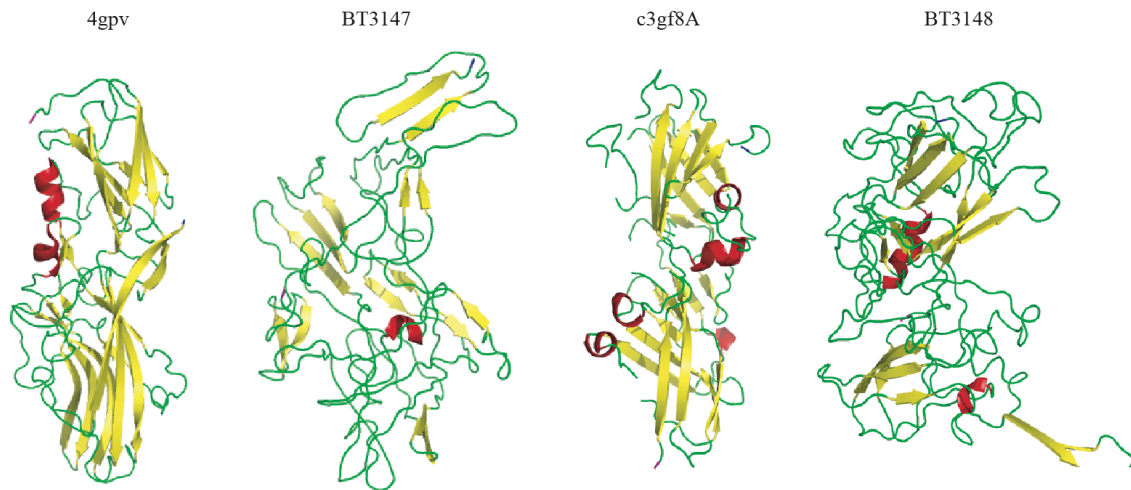

44

45 **Supplementary Figure S4. Comparison of structural models of BT3147 and BT3148.**

46 Structural modeling for BT3147 and BT3148 has been performed using Phyre2 web interface  
47 with the intensive mode (<http://www.sbg.bio.ic.ac.uk/phyre2/html/page.cgi?id=index>) and  
48 compared to 3D-structure of Mfa1-type structural model (PDB code 4gpv:) and Fim2B/Mfa2  
49 structural model (PDB code c3gf8A).

50

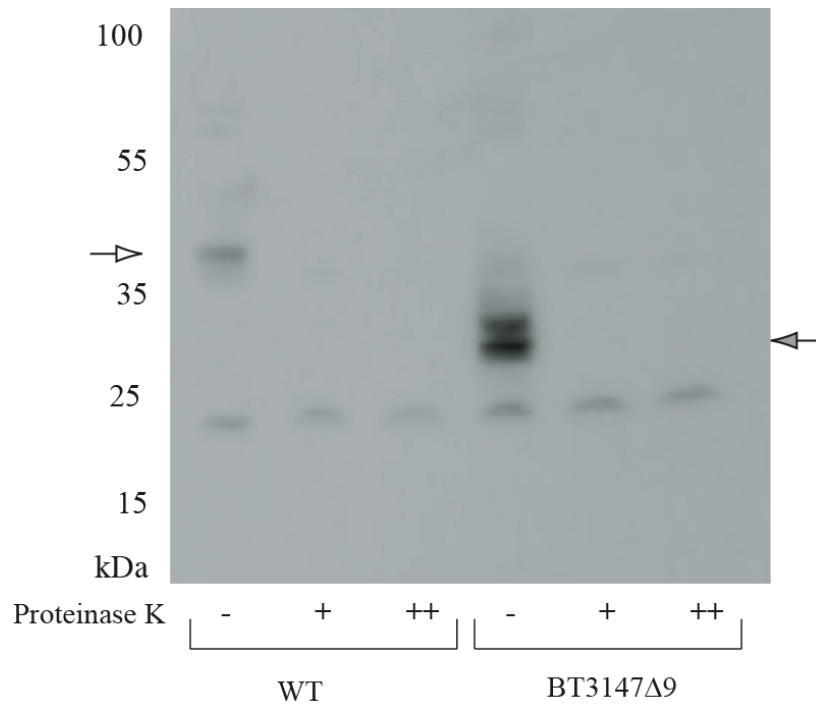

51 WT BT3147 $\Delta$ 9  
52 **Supplementary Figure S5. BT3147 sensitivity to proteinaseK treatment on whole-cells**  
53 Whole cells were washed with Tris 50mM pH 8.8 washed and treated with 10  $\mu$ g/ml or 20  
54  $\mu$ g/ml proteinase K for 30 minutes at 37°C. This treatment leads to degradation of BT3147  
55 and disappearance of BT3147 signal. White arrows indicates WT BT3147, black arrows indicate  
56 BT3147 $\Delta$ 9 variant.  
57  
58

## 59 SUPPLEMENTARY TABLES

60

61 Table S1. Wild type *B. thetaiotaomicron* collection used in this study

| Strains and plasmids                            | Relevant characteristics        | References  |
|-------------------------------------------------|---------------------------------|-------------|
| <i>Bacteroides thetaiotaomicron</i><br>VPI 5482 | Healthy adult human feces       | (1)         |
| L66                                             | Healthy adult human feces, INRA | INRA        |
| Jmh 42                                          | Perforated ulcer                | CHU Limoges |
| Jmh 43                                          | Blood                           | CHU Limoges |
| Jmh 44                                          | Blood                           | CHU Limoges |
| Jmh 45                                          | Liquid from redon drain         | CHU Limoges |
| Jmh 46                                          | Blood                           | CHU Limoges |
| Jmh 47                                          | Hepatic abscess                 | CHU Limoges |
| Jmh 48                                          | Abscess                         | CHU Limoges |
| Jmh 49                                          | Blood                           | CHU Limoges |
| Jmh 50                                          | Liquid ascite                   | CHU Limoges |
| Jmh 51                                          | Blood                           | CHU Limoges |
| Jmh 52                                          | Blood                           | CHU Limoges |
| Jmh 53                                          | Peritoneal liquid               | CHU Limoges |
| Jmh 54                                          | Bone biopsy                     | CHU Limoges |
| Jmh 55                                          | Skin biopsy                     | CHU Limoges |
| Jmh 56                                          | Blood                           | CHU Limoges |
| Jmh 57                                          | Bone biopsy                     | CHU Limoges |
| Jmh 58                                          | Blood                           | CHU Limoges |
| Jmh 59                                          | Blood                           | CHU Limoges |
| Jmh 60                                          | Hip implant                     | CHU Limoges |
| Jmh 61                                          | DPCA                            | CHU Limoges |
| Jmh 62                                          | Peritoneal liquid               | CHRU Lille  |
| Jmh 63                                          | Blood                           | CHRU Lille  |

|        |                   |             |
|--------|-------------------|-------------|
| Jmh 65 | Abdomen           | CHRU Lille  |
| Jmh 66 | Maxilar pus       | CHRU Lille  |
| Jmh 68 | Blood             | CHRU Lille  |
| Jmh 71 | Blood             | CHRU Lille  |
| Jmh 72 | Anal abscess      | CHRU Lille  |
| Jmh 73 | Blood             | CHRU Lille  |
| Jmh 76 | Fat tissue        | CHRU Lille  |
| Jmh 78 | Abdominal abscess | CHRU Lille  |
| Jmh 79 | Intestinal cyste  | CHRU Lille  |
| Jmh 81 | Blood             | CHU Limoges |
| Jmh 83 | Peritoneal liquid | CHRU Lille  |

---

62 1. Xu J, Bjursell MK, Himrod J, Deng S, Carmichael LK, Chiang HC, Hooper LV, Gordon JI. 2003. A  
63 genomic view of the human-Bacteroides thetaiotaomicron symbiosis. Science (New York, NY)  
64 299:2074-2076.  
65  
66

67

68

70 **TABLE S2. Primers used in this study.**

| Strain construction and analysis | Name                     | Sequence                                                        |
|----------------------------------|--------------------------|-----------------------------------------------------------------|
| <i>ΔBT3147</i>                   | <i>BT3147</i> -up-F      | 5'-GCGGTCGACAATGTGACGGAG<br>GACGGCATCAGC-3'                     |
|                                  | <i>BT3147</i> -up-R      | 5'-CAAAAAAAGCTTTTTTAATCATTCTTAATTG-3'                           |
|                                  | <i>BT3147</i> -down-F    | 5'-CGAATGGAGCGGAATATACAATGTGTGGATA<br>ATCATGCGTGGACGGAGTATCC-3' |
|                                  | <i>BT3147</i> -down-R    | 5'-GCGTCTAGATGAGCCGATGCAACTGTTG<br>GTTGC-3'                     |
| <i>ΔBT3146-5</i>                 | <i>BT3146</i> -up-F      | 5'-GCGGTCGACTTTCGAAAACAAGCTTTACC-3'                             |
|                                  | <i>BT3146</i> -up-R      | 5'-AATTGTTTACGTTTAAAATTATTGAATGTGTC-3'                          |
|                                  | <i>BT3145</i> -down-F    | 5'-GACACATTCAATAATTTTAAACGTAAACA<br>ATTATTGAAAAAAAACAAGCTAGG-3' |
|                                  | <i>BT3145</i> -down-R    | 5'-CCC CGCGCCCTACGGCACAGTTGA<br>GAGATTGGAG-3'                   |
| <i>BT3147Δ9</i>                  | <i>BT3147Δ9</i> -up-F    | 5'-GATAACATTCGAGTCGACAGAACGA<br>GGAGTTGTTTACC-3'                |
|                                  | <i>BT3147Δ9</i> -up-R    | 5'-TTAATCTAGATTTTTTCTACTAAACCG-3'                               |
|                                  | <i>BT3147Δ9</i> -down-F  | 5'-CGGTTTAGTAGAAAAAATCTAGATTAATGA<br>TTTTCGTCTCCACAAAACGATTG-3' |
|                                  | <i>BT3147Δ9</i> -down-R  | 5'-CTTATCGATACCCTACGGCACAGTTGA<br>GAGATTGGAG-3'                 |
| <i>ΔBT3148</i>                   | <i>BT3148</i> -up-F      | 5'- GAAAGAAGATAACATTCGAGGGAAAAACGA<br>TGCCTTGGTG -3'            |
|                                  | <i>BT3148</i> -up-R      | 5'- ATATTTACTTGTACCGTATTCATCGTCTTTGGT<br>TCTAC - 3'             |
|                                  | <i>BT3148</i> -down-F    | 5'- AGACGATGAATACGGTAACAAGTAAATATACA<br>ATTAGAA -3'             |
|                                  | <i>BT3148</i> -down-R    | 5'- ACCGCGGTGGCGCCGCTTAAACCGTCATGACC<br>ACTTTGA -3'             |
| <i>ΔBT3148-5</i>                 | <i>BT3148</i> -up-F      | 5'- GAAAGAAGATAACATTCGAGGGAAAAACGA<br>TGCCTTGGTG -3'            |
|                                  | <i>BT3148</i> -up-R      | 5'-GTTTTGTGGAAGACGCGTATTCATCGTCTTTGG<br>TTCTAC-3'               |
|                                  | <i>BT3145</i> -down-F    | 5'-AGACGATGAATACGCGTCTCCACAAAACGATTG-3'                         |
|                                  | <i>BT3145</i> -down-R    | 5'-ACCGCGGTGGCGCCGCTGAAACGCAGAAGAGG<br>CTTT-3'                  |
| <i>ΔBT3148-7</i>                 | <i>BT3148</i> -up-F      | 5'- GAAAGAAGATAACATTCGAGGGAAAAACGA<br>TGCCTTGGTG -3'            |
|                                  | <i>BT3148</i> -up-R      | 5'-GTTTTGTGGAAGACGCGTATTCATCGTCTTTGG<br>TTCTAC-3'               |
|                                  | <i>BT3147</i> -down-F    | 5'-AGACGATGAATACGTGACACATTCAATAATTTT<br>AAAC-3'                 |
|                                  | <i>BT3147</i> -down-R    | 5'-ACCGCGGTGGCGCCGCTTTCGGCATTGA<br>GGTCATTTA-3'                 |
| Insertion of <i>BT1311</i>       | <i>BT1311</i> promoter-F | 5'-GGGTCTAGATAGTGCCATATGTTAAAAACA                               |



|                                             |                          |                                                                 |
|---------------------------------------------|--------------------------|-----------------------------------------------------------------|
| promoter in<br>pNBU2- <i>bla-erm</i>        | <i>BT3131</i> promoter-R | GATTTGGAGTGC-3'<br>5'-CCCGCGCCGCTGATCTGGAAGAAGCA<br>ATGAAAGC-3' |
| Cloning <i>BT3148-7</i><br>in pNBU1311      | <i>BT3148-F</i>          | 5'-CCAAATCTGTTTTTAACATATGCTGGTCAT<br>GTTCGTGTGG-3'              |
|                                             | <i>BT3147-R</i>          | 5'-GTTCTAGATAGTGCTTATTTTGTATAT<br>CAAAAGC-3'                    |
| Cloning of <i>BT3146-5</i><br>in pNBU1311   | <i>BT3146-F</i>          | 5'-CCCCATATGAATGATTTCAAGAATCAATGG-3'                            |
|                                             | <i>BT3146-R</i>          | 5'-CCGTCTAGATCAGCCTTTCTTGTCCACG-3'                              |
| Cloning <i>BT3148-7Δ9</i> in<br>pNBU1311    | <i>BT3148-7Δ9-F</i>      | 5'- GTTTTTAACATATGGCACTATATGCTGGTCATG<br>TTCGTGTG -3'           |
|                                             | <i>BT3148-7Δ9-R</i>      | 5'-AGCCCGGGGATCCACTAGTTTTAATCTAG<br>ATTTTTTCTACTAAACCGTCA-3'    |
| 72 Cloning <i>tetQ</i> into pExchange       | <i>tetQ-F</i>            | 5'-GGCCATATGAATATTATAAATTTAGGAAT<br>TCTTGCTCAC-3'               |
|                                             | <i>tetQ-R</i>            | 5'-CCCTCTAGATCGTCTATTTTTTTATTGCCA<br>AGTCTAATGC-3'              |
| Deletion of <i>BT3147</i> upstream<br>of Tn | <i>BT3148-up-F</i>       | 5'-GCGGTCGACAGCAGACCTCTGCTGATAGC-3'                             |
|                                             | <i>BT3148-up-R</i>       | 5'-ACATATCTTCAGATAGATGTATC-3'                                   |
|                                             | <i>BT3147*-down-F</i>    | 5'-GATACATCTATCTGAAGATATGTTTCTACC<br>GGCACTTCTGC-3'             |
|                                             | <i>BT3147*-down-R</i>    | 5'-GCGTCTAGACTCTTTGTTAACCC-3'                                   |
| Localization of Tn                          | ARB-bt1                  | 5'-GGCCACGCGTCTGACTAGTAC<br>NNNNNNNNNGATAT-3'                   |
|                                             | ARB-bt-bis               | 5'-GGCCACGCGTCTGACTAGTAC-3'                                     |
|                                             | pSCIRerm R               | 5'-GATTTGAACGTTGCGAAGC-3'                                       |
|                                             | pSCIRerm R-bis           | 5'-TTTTTGCGTTTCTACCTGC-3'                                       |
|                                             | pSCIRerm L               | 5'-CGTATCGGTCTGTATATCAGC-3'                                     |
|                                             | pSCIRerm L-bis           | 5'-CTCATCTTTCTGAGTCCACC-3'                                      |
| DNA contamination check<br>by RT-qPCR       | <i>DNApol3-F</i>         | 5'-TGTCGCCCCGTCTGGTAGATA-3'                                     |
|                                             | <i>DNApol3-R</i>         | 5'-CCGCCTCCTTATCCTCACAC-3'                                      |

73

74

75 **Table S3. List of strains used in this study**

| Strains and plasmids                             | Relevant characteristics                                                                               | References <sup>a</sup> |
|--------------------------------------------------|--------------------------------------------------------------------------------------------------------|-------------------------|
| <b><i>Escherichia coli</i></b>                   |                                                                                                        |                         |
| MG1655                                           | K-12 wild-type strain                                                                                  | (2)                     |
| S17-1 $\lambda$ pir                              | (F <sup>-</sup> ) RP4-2-Tc::Mu aphA::Tn7 recA $\lambda$ pir lysogen. Sm <sup>R</sup> , Tp <sup>R</sup> |                         |
| S17-1 $\lambda$ pir_pSAM-bt                      | S17-1 $\lambda$ pir derivative carrying pSAM-bt                                                        | This study              |
| S17-1 $\lambda$ pir_pExchange-tdk                | S17-1 $\lambda$ pir derivative carrying pExchange-tdk                                                  | This study              |
| S17-1 $\lambda$ pir_pNBU2-bla-erm                | S17-1 $\lambda$ pir carrying pNBU2-bla-erm                                                             | This study              |
| S17-1 $\lambda$ pir_pExchange-BT3147             | S17-1 $\lambda$ pir carrying pExchange-BT3147                                                          | This study              |
| S17-1 $\lambda$ pir_pExchange-BT3146-5           | S17-1 $\lambda$ pir carrying pExchange-BT3146-3145                                                     | This study              |
| S17-1 $\lambda$ pir_pExchange-BT3147 $\Delta$ 9  | S17-1 $\lambda$ pir carrying pExchange-BT3147 $\Delta$ 9                                               | This study              |
| S17-1 $\lambda$ pir_pExchange-BT3148             | S17-1 $\lambda$ pir carrying pExchange-BT3148                                                          | This study              |
| S17-1 $\lambda$ pir_pExchange-BT3148-5           | S17-1 $\lambda$ pir carrying pExchange-BT3148-3145                                                     | This study              |
| S17-1 $\lambda$ pir_pExchange-BT3148-7           | S17-1 $\lambda$ pir carrying pExchange-BT3148-3147                                                     | This study              |
| S17-1 $\lambda$ pir_pNBU1311                     | S17-1 $\lambda$ pir carrying pNBU1311                                                                  | This study              |
| S17-1 $\lambda$ pir_pNBU1311-BT3146-5            | S17-1 $\lambda$ pir carrying pNBU1311-BT3146-3145                                                      | This study              |
| S17-1 $\lambda$ pir_pNBU1311-BT3148-7            | S17-1 $\lambda$ pir carrying pNBU1311-BT3148-3147                                                      | This study              |
| S17-1 $\lambda$ pir_pNBU1311-BT3148-7 $\Delta$ 9 | S17-1 $\lambda$ pir carrying pNBU1311- BT3148-3147 $\Delta$ 9                                          | This study              |
| S17-1 $\lambda$ pir_pExchange-tetQ-BT3147*       | S17-1 $\lambda$ pir carrying pExchange-tetQ-BT3147*                                                    | This study              |
| S17-1 $\lambda$ pir_pExchange-tetQ               | S17-1 $\lambda$ pir carrying pExchange-tetQ                                                            | This study              |
| <b><i>Bacteroides thetaiotaomicron</i></b>       |                                                                                                        |                         |
| VPI 5482                                         | Healthy adult human feces                                                                              | (1)                     |
| VPI 5482_Atdk                                    | Deletion of thymidine kinase in the wild type strain ATCC29148                                         | (3)                     |
| VPI 5482_ $\Delta$ BT3147                        | Deletion of BT3147                                                                                     | This study              |
| VPI 5482_ $\Delta$ BT3146-5                      | Deletion of BT3146-3145                                                                                | This study              |
| VPI 5482 $\Delta$ BT3148-5                       | Deletion of BT3148-3145                                                                                | This study              |
| VPI 5482 $\Delta$ BT3148-7                       | Deletion of BT3148-3147                                                                                | This study              |
| VPI 5482 BT3147 $\Delta$ 9                       | Deletion of BT3146-3145 and the last 9 C-terminal amino acids of BT3147                                | This study              |
| VPI 5482 $\Delta$ BT3148 BT3147 $\Delta$ 9       | Deletion of BT3148 in VPI 5482_ BT3147 $\Delta$ 9 strain                                               | This study              |

|                                |                                                                                                                     |            |
|--------------------------------|---------------------------------------------------------------------------------------------------------------------|------------|
| VPI 5482_p. <i>BT3146-5</i>    | Chromosomal-based expression of <i>BT3146-5</i> from pNBU1311                                                       | This study |
| VPI 5482_p. <i>BT3148-7</i>    | Chromosomal-based expression of <i>BT3148-7</i> from pNBU1311                                                       | This study |
| VPI 5482_p. <i>BT3148-7</i> Δ9 | Chromosomal-based expression of <i>BT3148</i> and the 9 amino acid truncated version of <i>BT3147</i> from pNBU1311 | This study |
| VPI 5482_pNBU2- <i>bla-erm</i> | Erythromycin resistant strain                                                                                       | This study |
| 1H2 Δ <i>BT3147</i> *          | 1H2 mutant with deletion of <i>BT3147</i> portion upstream of the Tn-insertion                                      | This study |

## Plasmids

|                                          |                                                                                                                  |                                |
|------------------------------------------|------------------------------------------------------------------------------------------------------------------|--------------------------------|
| pSAM-bt                                  | Random transposon mutagenesis                                                                                    | (Goodman <i>et al.</i> , 2009) |
| pExchange- <i>tdk</i>                    | Site-directed unmarked gene deletion                                                                             | (Martens <i>et al.</i> , 2008) |
| pNBU2- <i>bla-erm</i>                    | Chromosomal-based gene expression                                                                                | (Martens <i>et al.</i> , 2008) |
| pNBU1311                                 | Derivative of pNBU2- <i>bla-erm</i> with cloned constitutive promoter of <i>BT1311</i> for gene expression       | This study                     |
| pExchange- <i>BT3147</i>                 | pExchange derivative for unmarked deletion of <i>BT3147</i>                                                      | This study                     |
| pExchange- <i>BT3146-5</i>               | pExchange derivative for unmarked deletion of <i>BT3146</i> and <i>BT3145</i>                                    | This study                     |
| pExchange- <i>BT3147</i> Δ9              | pExchange derivative for unmarked deletion of <i>BT3146-5</i> and last 9 amino acids of <i>BT3147</i> C-terminus | This study                     |
| pExchange- <i>BT3148</i>                 | pExchange derivative for unmarked deletion of <i>BT3148</i>                                                      | This study                     |
| pExchange- <i>BT3148-5</i>               | pExchange derivative for unmarked deletion of <i>BT3148</i> to <i>BT3145</i>                                     | This study                     |
| pExchange- <i>BT3148-7</i>               | pExchange derivative for unmarked deletion of <i>BT3148</i> and <i>BT3147</i>                                    | This study                     |
| pNBU1311- <i>BT3146-5</i>                | pNBU1311 derivative for expression of <i>BT3146-5</i>                                                            | This study                     |
| pNBU1311- <i>BT3148-7</i>                | pNBU1311 derivative for expression of <i>BT3148-7</i>                                                            | This study                     |
| pNBU1311- <i>BT3148-7</i> <sup>Δ9</sup>  | pNBU1311 derivative for expression of <i>BT3148-7</i> <sup>Δ9</sup>                                              | This study                     |
| pExchange- <i>tetQ</i>                   | pExchange derivative with <i>erm</i> resistance exchanged for tetracycline                                       | This study                     |
| pExchange- <i>tetQ</i> - <i>BT3147</i> * | pExchange- <i>tetQ</i> derivative for deletion of <i>BT3147</i> portion laying upstream of the Tn insertion      | This study                     |

76

77 <sup>a</sup> Bacterial strains from our laboratory collection unless otherwise specified.

78 CRBIP: *Institut Pasteur, Centre de Ressources Biologiques de l'Institut Pasteur.*

79

- 80 1. Xu J, Bjursell MK, Himrod J, Deng S, Carmichael LK, Chiang HC, Hooper LV, Gordon JI. 2003. A
- 81 genomic view of the human-Bacteroides thetaiotaomicron symbiosis. *Science* (New York, NY)
- 82 299:2074-2076.
- 83 2. Guyer MS, Reed RR, Steitz JA, Low KB. 1981. Identification of a sex-factor-affinity site in *E. coli* as
- 84 gamma delta. *Cold Spring Harb Symp Quant Biol* 45 Pt 1:135-40.
- 85 3. Koropatkin NM, Martens EC, Gordon JI, Smith TJ. 2008. Starch catabolism by a prominent human gut
- 86 symbiont is directed by the recognition of amylose helices. *Structure* (London, England : 1993)
- 87 16:1105-1115.

88

89
